# Supplementary material for: Benzimidazole–triazine based exciplex films as emitters and hosts to construct highly efficient OLEDs with a small efficiency roll-off
Source: Royal Society of Chemistry journal article supplement (doi:10.1039/c9tc06212b), 2020-01-01
Supplement: c9tc06212b1.pdf [file c9tc06212b1.pdf]

## **Supporting Information**

### **Benzimidazole-triazine based exciplex films as emitters and hosts to construct highly efficient OLEDs with small efficiency roll-off**

Baoyan Liang, Jiaxuan Wang, Yuanyuan Cui, Jinbei Wei\*, and Yue Wang\*

State Key Laboratory of Supramolecular Structure and Materials, Jilin University,

Changchun 130012, People's Republic of China.

## General Information

All starting materials were purchased from commercial sources and used without further purification. Solvents for synthetic reactions were analytical grade and used as received.  $^1\text{H}$  and  $^{13}\text{C}$  NMR spectra were recorded on Bruker Mercury 500 MHz spectrometer with tetramethylsilane (TMS) as the internal standard. Mass spectra were recorded on a Thermo Fisher ITQ 1100 mass spectrometer. Element analyses were performed on a Flash EA 1112 elemental analyser. DSC measurements were performed on a Netzsch DSC 204 F1 instrument at a heating rate of  $10\text{ K min}^{-1}$  under nitrogen. Thermogravimetric analyses (TGA) were performed on a TA Q500 thermogravimeter by measuring their weight loss while heating at a rate of  $10\text{ }^\circ\text{C min}^{-1}$  from 25 to  $800\text{ }^\circ\text{C}$  under nitrogen atmosphere. UV–vis absorption spectra were recorded by a Specord 210 Plus spectrophotometer (Analytik Jena AG, Germany). The fluorescence spectra of solutions and films were recorded using a Shimadzu RF-5301 PC spectrometer. The phosphorescence spectra at 77 K were captured by an optical fiber detector that connected to a Maya 2000 Pro CCD spectrometer. The fluorescence lifetime and quantum yield of the blend films were measured using a calibrated integrating sphere combined with an Edinburgh FLS920 spectrometer. Electrochemical measurements were performed with a BAS 100W Bioanalytical electrochemical work station calibrated against a ferrocene/ferrocenium redox couple, in which glassy carbon, Pt wire and Ag/AgCl were used as working, counter and reference electrodes, respectively. The oxidation and reduction potentials were measured in dichloromethane and *N,N*-dimethylformamide containing 0.1 mol/L of  $n\text{-Bu}_4\text{NPF}_6$  as a supporting electrolyte at a scan rate of  $50\text{ mV s}^{-1}$ , respectively.

## Theoretical calculations method

The ground state geometries of gas state were fully optimized by B3LYP method including Grimme's dispersion correction with 6-31G (d,p) basis set using Gaussian 09 software package.<sup>1-5</sup> HOMO and LUMO were visualized with Gaussview 5.0. The excited state properties were calculated by TD-DFT with the

same theory level as DFT. After which NTO of  $S_0 \rightarrow S_1$  transitions were analyzed using Multiwfn 3.6.<sup>6</sup>

### **Device Fabrication and Measurement**

The devices were fabricated through vacuum deposition of the materials at a base pressure around  $5 \times 10^{-4}$  Pa. The ITO coated glass substrates ( $20 \text{ } \Omega/\text{square}$ ) were pre-cleaned carefully in deionized water, acetone, and isopropanol and then dried in an oven. After treated by plasma for 5 min, the ITO substrates were transferred into a deposition chamber. All organic materials were thermally evaporated at a rate of  $1.0 \text{ } \text{\AA} \text{ s}^{-1}$ . A thin LiF layer (1.0 nm) was deposited at a rate of  $0.1 \text{ } \text{\AA} \text{ s}^{-1}$  and the Al metal cathode was deposited at a rate of  $5 \text{ } \text{\AA} \text{ s}^{-1}$ . The thicknesses of the organic and the cathode layers were controlled by using a quartz crystal thickness monitor. The electrical characteristics of the devices were measured with a Keithley 2400 source meter. The EL spectra and luminance of the devices were recorded on a PR650 spectrometer. Current-Voltage characteristics of single-carrier devices were measured using the same semiconductor parameter analyzer. All device characterizations were carried out under ambient atmosphere.

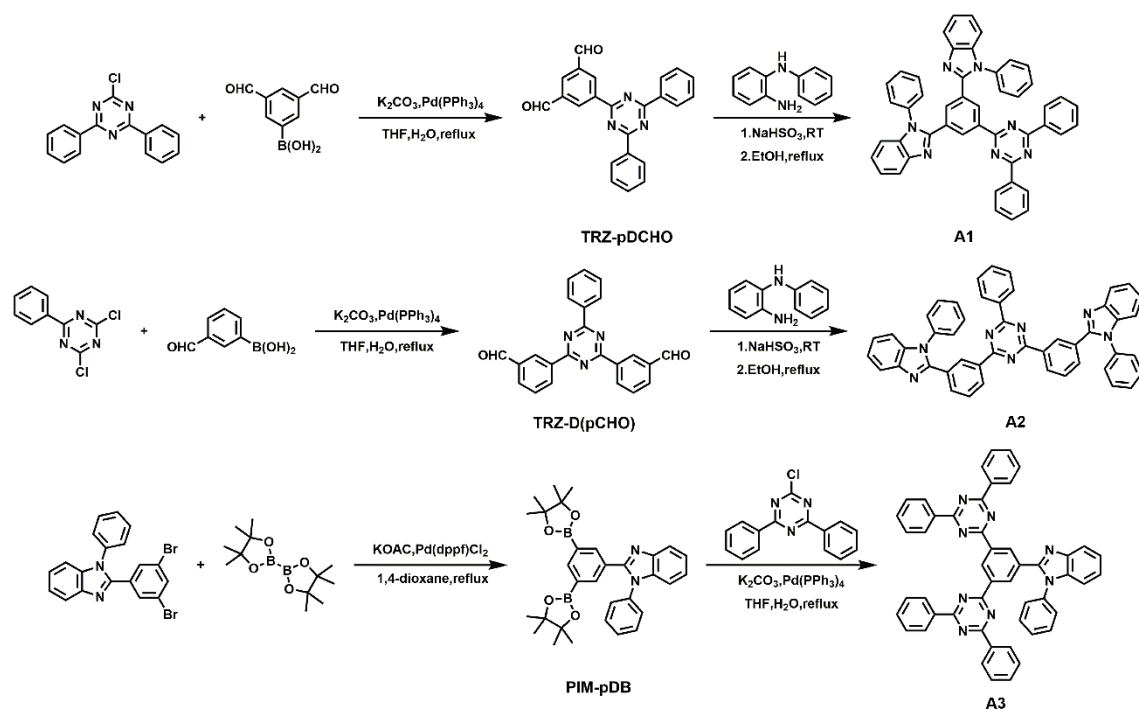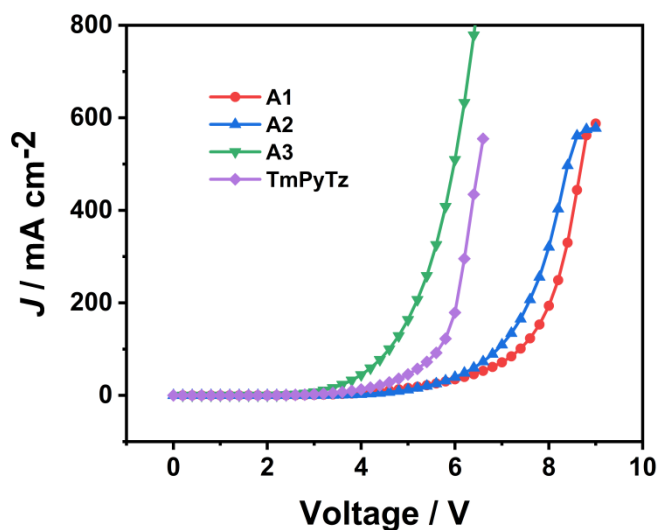

**Fig. S1** Electron-only carrier devices of **A1**, **A2**, and **A3** and TmPyTz (2,4,6-tris(3-(pyridin-3-yl)phenyl)-1,3,5-triazine). ITO/Bphen (10 nm)/ **A1** or **A2** or **A3** or TmPyPz (60 nm)/Bphen(10 nm)/LiF (1 nm)/Al (100 nm). Here, Bathophenanthroline (Bphen) is used to prevent holes and help electrons injection from the anode and cathode, respectively.

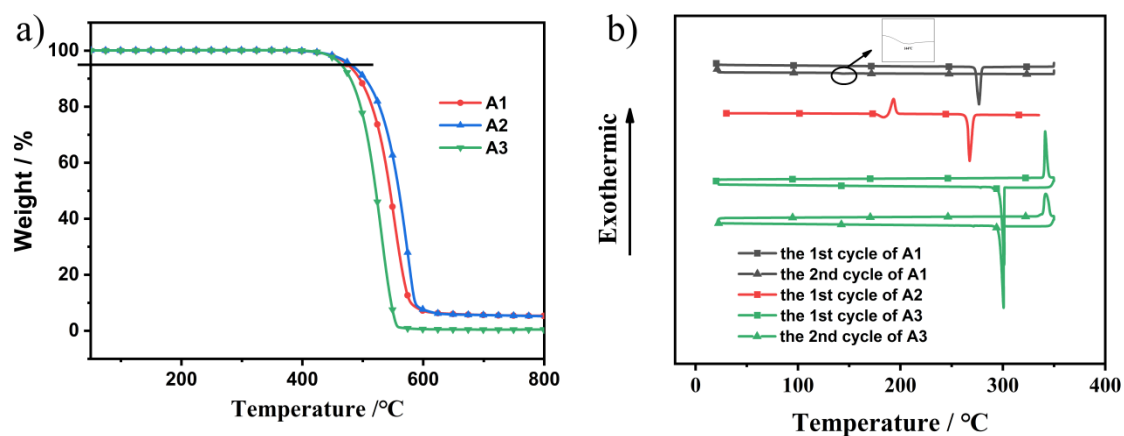

**Fig. S2** TGA (a) and DSC (b) of A1, A2, and A3.

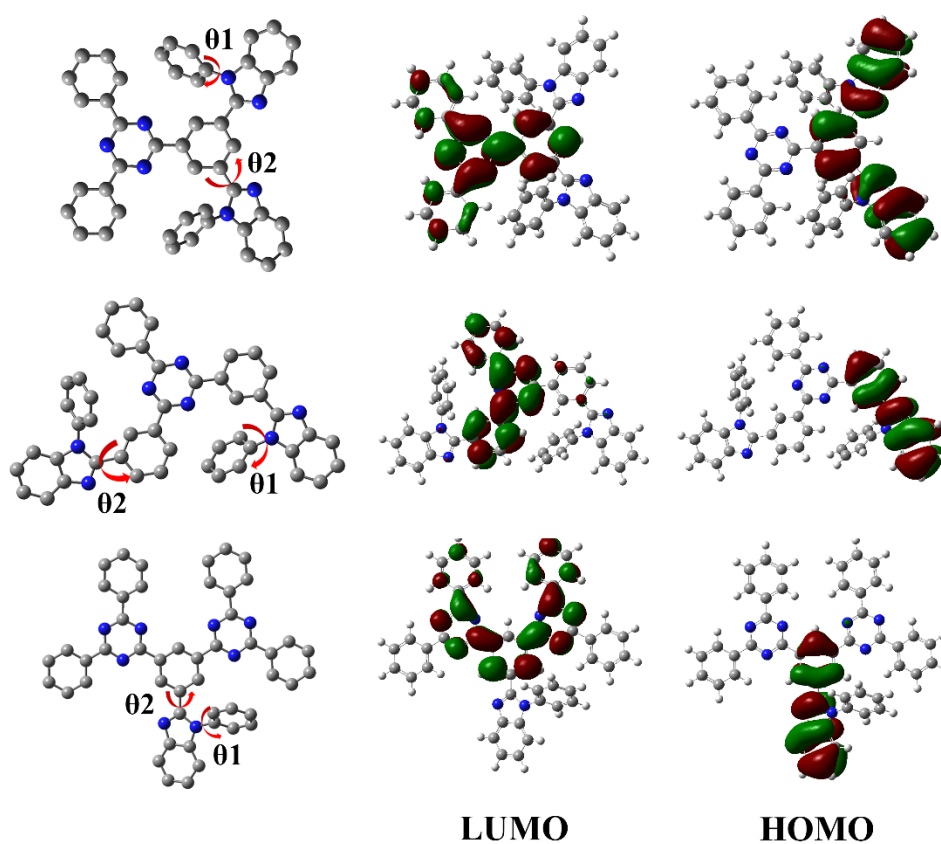

**Fig. S3** Optimized configurations and distribution of HOMO and LUMO of A1, A2, and A3.

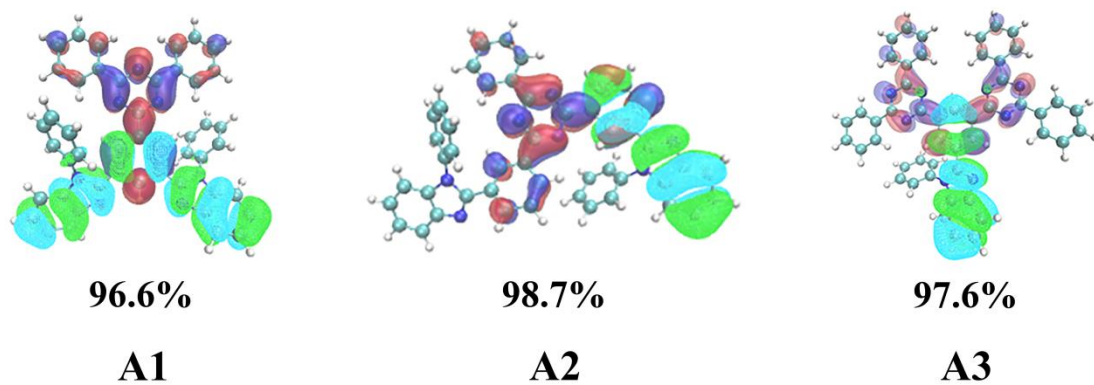

**Fig. S4** NTOs of S0→S1 (mesh, hole; transparent, particle).

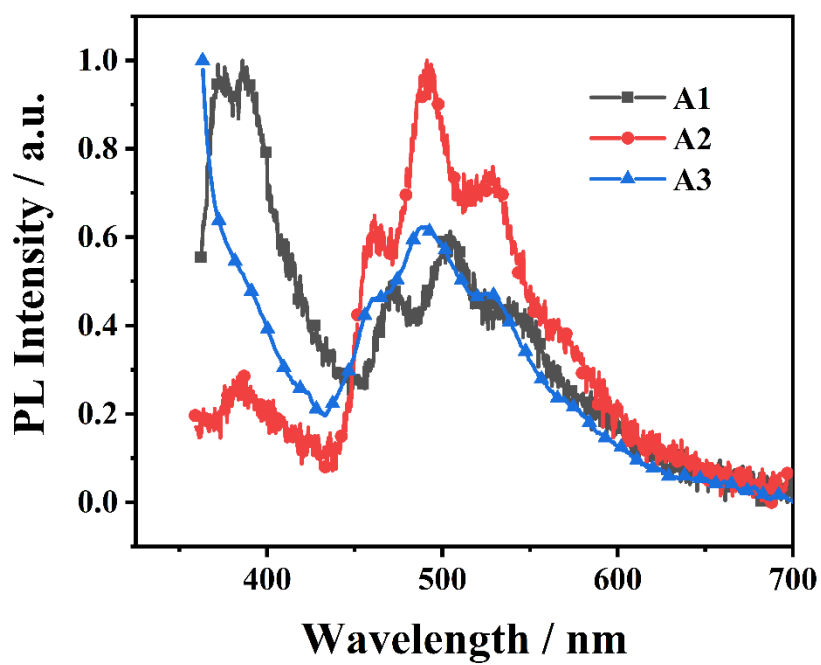

**Fig.S5** PL spectra of A1, A2, and A3 in toluene ( $10^{-5}$  M) at 77K (excited at 335 nm).

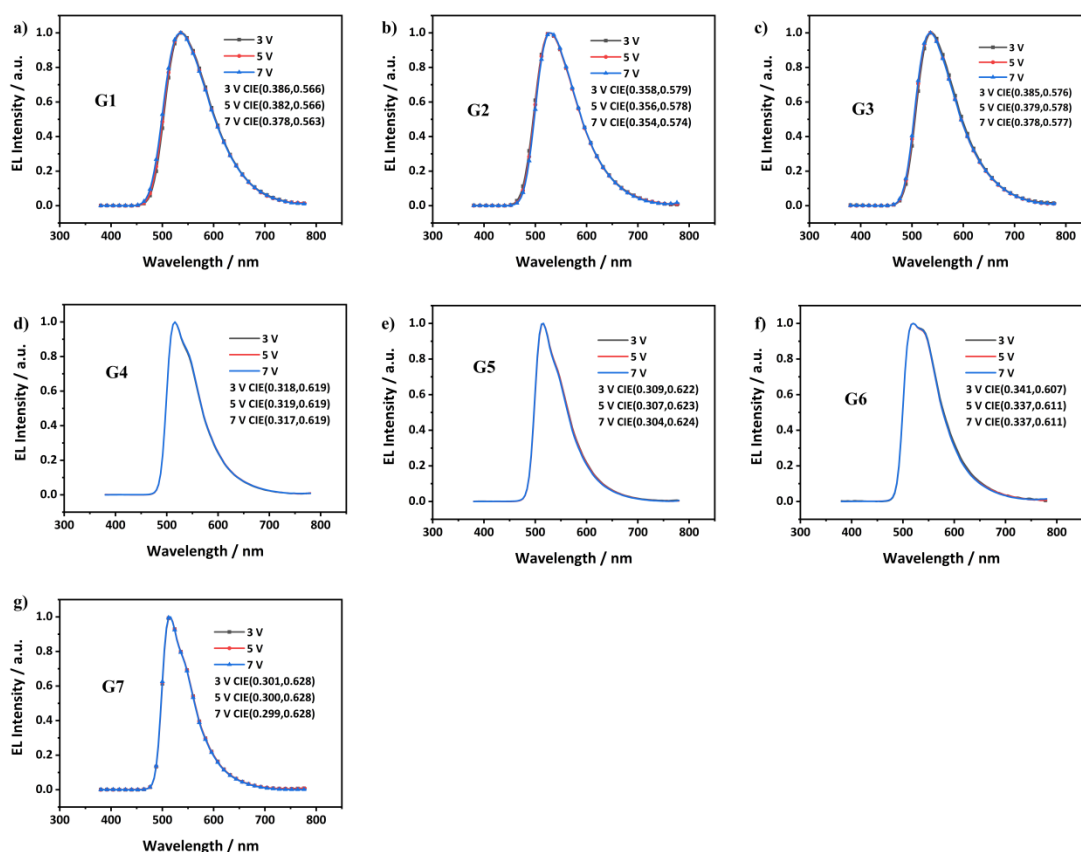

**Fig. S6** EL spectra and CIE of devices **G1~G7** at 3V, 5V and 7V.

**Table S1.** Summary of high efficiency OLEDs based on Ir(ppy)<sub>3</sub>.

| References | Host            | V <sub>on</sub><br>[V] | EQE<br>[%]                                                    |
|------------|-----------------|------------------------|---------------------------------------------------------------|
|            |                 |                        | max; at 1000 cd m <sup>-2</sup> ; at 10000 cd m <sup>-2</sup> |
| This work  | TAPC: <b>A2</b> | 2.4                    | 28.3, 28.1, 24.3                                              |
|            | TAPC: <b>A4</b> | 2.4                    | 29.6, 29.4, 25.8                                              |
| Ref [7]    | TCTA: B4PYMPM   | 2.3                    | 27.0, 26.7, 23.9                                              |
| Ref [8]    | TCTA: B3PYMPM   | 2.7                    | 24.7, -, -                                                    |
| Ref [9]    | DPhPCz: DBFTrz  | 2.7                    | ~17, ~16, ~13                                                 |
| Ref [10]   | BP-DPPI         | 3.0                    | 26.6, 23.6, -                                                 |
|            | BP-DTPI         | 4.0                    | 19.7, 13.9, -                                                 |

## References

- 1 Becke, A. D. *J. Chem. Phys.*, 1993, **98**, 5648.
- 2 Lee, C.; Yang, W.; Parr, R. G. *Phys. Rev. B* 1988, **37**, 785.
- 3 Krishnan, R.; Binkley, J. S.; Seeger, R.; Pople, J. J. *J. Chem. Phys.*, 1980, **72**, 650.
- 4 Grimme, S.; Antony, J.; Ehrlich, S.; Krieg, H. *J. Chem. Phys.*, 2010, **132**, 154104.
- 5 Frisch, M. J.; Trucks, G. W.; Schlegel, H. B.; Scuseria, G. E.; Robb, M. A.; Cheeseman, J. R.; Scalmani, G.; Barone, V.; Petersson, G. A.; Nakatsuji, H.; Li, X.; Caricato, M.; Marenich, A. V.; Bloino, J.; Janesko, B. G.; Gomperts, R.; Mennucci, B.; Hratchian, H. P.; Ortiz, J. V.; Izmaylov, A. F.; Sonnenberg, J. L.; Williams-Young, D.; Ding, F.; Lipparini, F.; Egidi, F.; Goings, J.; Peng, B.; Petrone, A.; Henderson, T.; Ranasinghe, D.; Zakrzewski, V. G.; Gao, J.; Rega, N.; Zheng, G.; Liang, W.; Hada, M.; Ehara, M.; Toyota, K.; Fukuda, R.; Hasegawa, J.; Ishida, M.; Nakajima, T.; Honda, Y.; Kitao, O.; Nakai, H.; Vreven, T.; Throssell, K.; Montgomery, J. A., Jr.; Peralta, J. E.; Ogliaro, F.; Bearpark, M. J.; Heyd, J. J.; Brothers, E. N.; Kudin, K. N.; Staroverov, V. N.; Keith, T. A.; Kobayashi, R.; Normand, J.; Raghavachari, K.; Rendell, A. P.; Burant, J. C.; Iyengar, S. S.; Tomasi, J.; Cossi, M.; Millam, J. M.; Klene, M.; Adamo, C.; Cammi, R.; Ochterski, J. W.; Martin, R. L.; Morokuma, K.; Farkas, O.; Foresman, J. B.; Fox, D. J. Gaussian 09, Revision D.01, Gaussian, Inc., Wallingford, CT 2013.
- 6 T. Lu and F. Chen, *J. Comput. Chem.*, 2012, **33**, 580.
- 7 H. G. Kim, K. H. Kim and J. J. Kim, *Adv. Mater.*, 2017, **29**, 1702159.
- 8 M.-J. Kim, S.-J. Yoo, J. Hwang, S.-J. Park, J.-W. Kang, Y.-H. Kim, J.-J. Kim and S.-K. Kwon, *J. Mater. Chem. C*, 2017, **5**, 3107.
- 9 J. M. Choi, J. H. Kim, Y. J. Kang and J. Y. Lee, *Org. Electron.*, 2017, **49**, 393.
- 10 C. Li, Z. Li, J. Liang, H. Luo, Y. Liu, J. Wei, Y. Wang, *J. Mater. Chem. C*, 2018, **6**, 12888.
